# Supplementary material for: Perovskite-related (CH3NH3)3Sb2Br9 for forming-free memristor and low-energy-consuming neuromorphic computing
Source: Royal Society of Chemistry journal article supplement (doi:10.1039/c8nr09918a), 2019-01-01
Supplement: c8nr09918a1.pdf [file c8nr09918a1.pdf]

## Supporting Information

# **Perovskite-related $(\text{CH}_3\text{NH}_3)_3\text{Sb}_2\text{Br}_9$ for Forming-Free Memristor and Low-Energy-Consuming Neuromorphic Computing**

June-Mo Yang,<sup>‡a</sup> Eun-Suk Choi,<sup>‡a</sup> So-Yeon Kim,<sup>a</sup> Jeong-Hoon Kim,<sup>b</sup> Jin-Hong Park<sup>b</sup> and  
Nam-Gyu Park<sup>\*a</sup>

<sup>a</sup>School of Chemical Engineering, Energy Frontier Laboratory, Sungkyunkwan University,  
Suwon 16419, Korea.

<sup>b</sup>Department of Electrical and Computer Engineering, Sungkyunkwan University, Suwon  
16419, Korea.

\*Corresponding author

N.-G. P.: E-mail: [npark@skku.edu](mailto:npark@skku.edu)

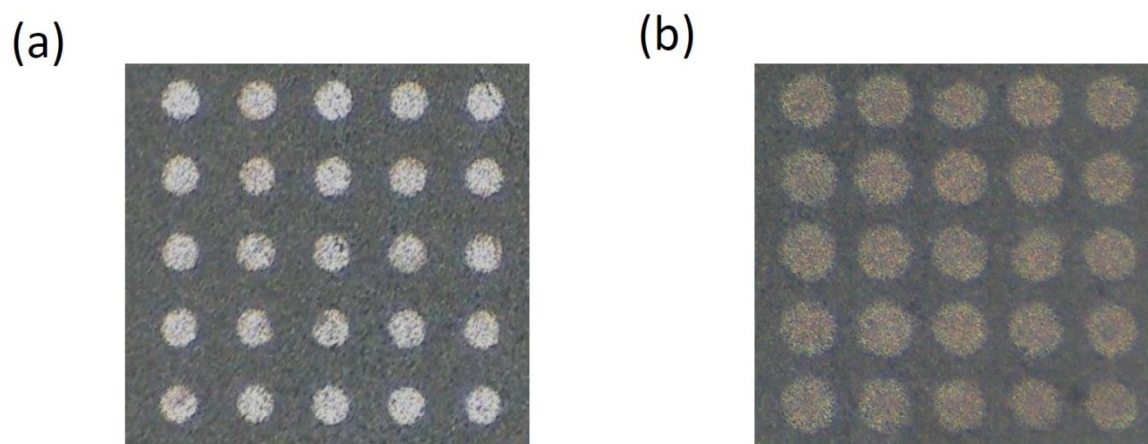

**Figure S1.** Optical microscopic images of (a) Ag/PMMA/MA<sub>3</sub>Sb<sub>2</sub>Br<sub>9</sub>/ITO device and (b) Ag/MA<sub>3</sub>Sb<sub>2</sub>Br<sub>9</sub>/ITO device, showing Ag top electrodes.

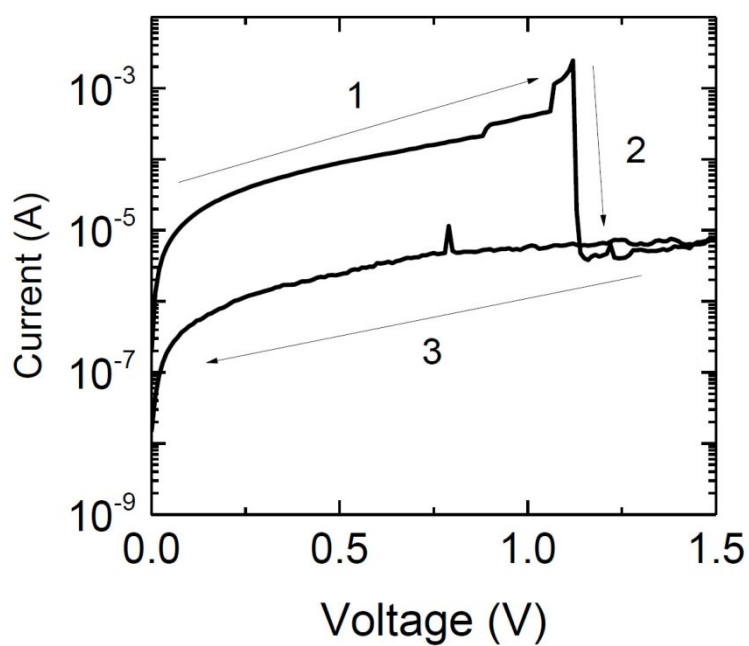

**Figure S2.** Initial I-V characteristics of Au/MA<sub>3</sub>Sb<sub>2</sub>Br<sub>9</sub>/ITO device. Numbers indicate sweeping sequence.

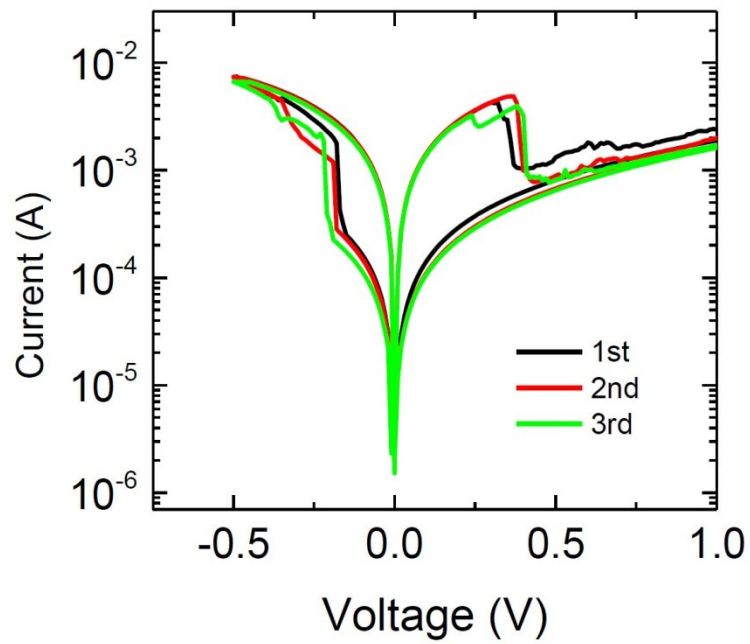

**Figure S3.** I-V characteristics of Ag/MA<sub>3</sub>Sb<sub>2</sub>Br<sub>9</sub>/ITO devices after initial RESET.

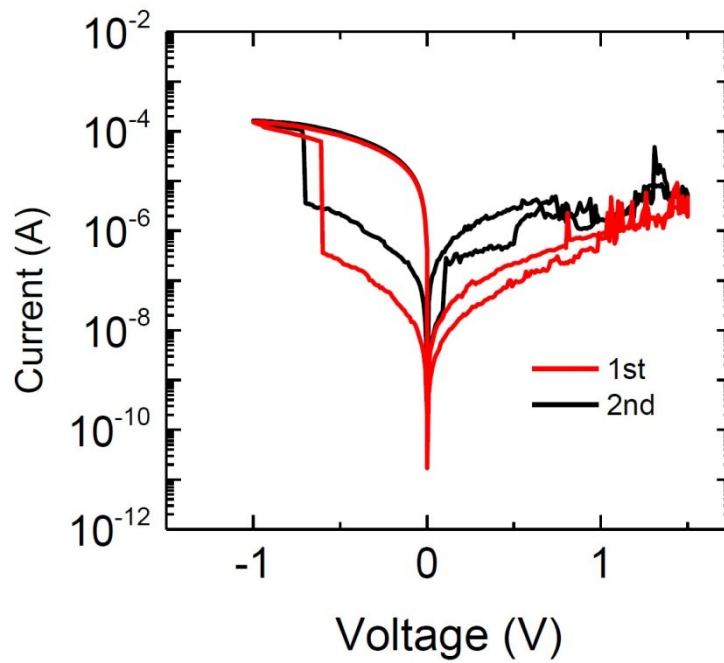

**Figure S4.** I-V characteristics of Au/MA<sub>3</sub>Sb<sub>2</sub>Br<sub>9</sub>/ITO devices after initial RESET.

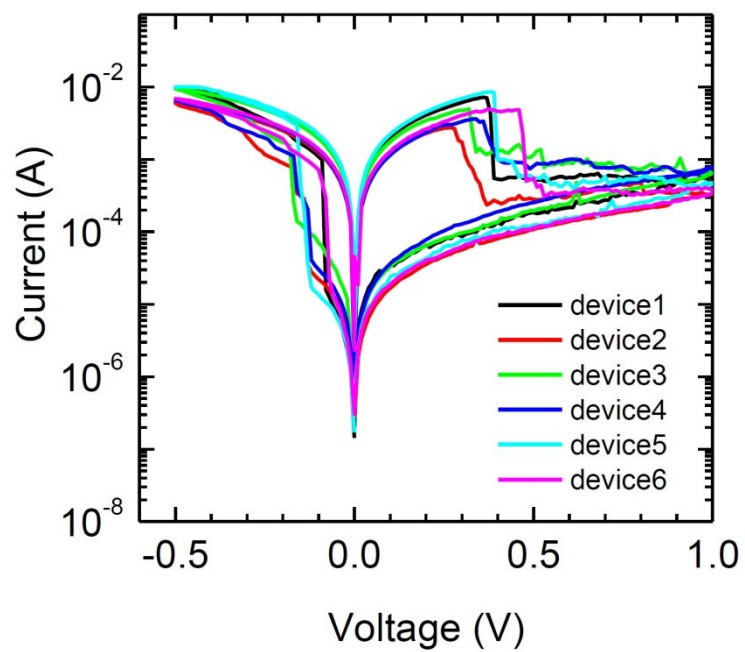

**Figure S5.** I-V characteristic of Ag/MA<sub>3</sub>Sb<sub>2</sub>Br<sub>9</sub>/ITO for 6 different devices
